# Supplementary material
Source: PubMed Central journal article supplement (PMC7168791)
Supplement: 1Supplemental_Material2.pdf [file 1Supplemental_Material2.pdf]

**Supplemental Table:** Arterial blood gas values and mean arterial pressure (MAP) under isoflurane or Avertin anesthesia (n=5 mice, mean  $\pm$  SD with t-test p-values for intergroup comparisons).

|                                | <b>Isoflurane</b> | <b>Avertin</b>  | <b>p-value</b> |
|--------------------------------|-------------------|-----------------|----------------|
| <b>pH</b>                      | 7.53 $\pm$ 0.04   | 7.34 $\pm$ 0.03 | <0.0001        |
| <b>pCO<sub>2</sub> (mm Hg)</b> | 25 $\pm$ 5        | 43 $\pm$ 7      | 0.003          |
| <b>pO<sub>2</sub> (mm Hg)</b>  | 165 $\pm$ 21      | 141 $\pm$ 27    | 0.20           |
| <b>MAP (mm Hg)</b>             | 104 $\pm$ 6       | 91 $\pm$ 8      | 0.03           |
