# Supplementary material
Source: PubMed Central journal article supplement (PMC7168791)
Supplement: 2Supplemental_Material1.pdf [file 2Supplemental_Material1.pdf]

**Supplemental Movie:**

Representative movie of global signal-regressed changes in optical signal under Avertin, ketamine-xylazine, urethane, chloral hydrate, and isoflurane.
